# Supplementary material
Source: HighWire-hosted journal article supplement (http://molpharm.aspetjournals.org/highwire/filestream/77467/field_highwire_adjunct_files/0/Supplemental_98012.pdf)

## **Pharmacologic inhibition of Mnks in acute myeloid leukemia**

Theodosia Teo, Frankie Lam, Mingfeng Yu, Yuchao Yang, Sunita KC Basnet, Hugo Albrecht, Matthew J Sykes, and Shudong Wang

Centre for Drug Discovery and Development, Sansom Institute for Health Research, Centre for Cancer Biology, and School of Pharmacy and Medical Sciences, University of South Australia, Adelaide, South Australia 5001, Australia.

### **Corresponding Author**

Shudong Wang

Address: Centre for Drug Discovery and Development, School of Pharmacy and Medical Sciences, University of South Australia, Adelaide, South Australia 5001, Australia

Tel.: +61-8-830 22372; Fax: +61-8-830 21087

E-mail: [shudong.wang@unisa.edu.au](mailto:shudong.wang@unisa.edu.au)

### **Supplementary data**

**Supplemental Figure 1.**

**Graphical representation of the relative band intensity of 4E-BP1 phosphorylation at Thr37/46 when compared to control in MOLM-13 cells upon treatment with the indicated concentrations of Mnk inhibitors for 24 h. DMSO diluent is used as a control.**

Western blot results are quantified using the Image Lab software version 5.0 and statistical analysis is performed. Data represent the mean  $\pm$  SD of at least two independent repeats. \* $p < 0.05$  when compared to control.

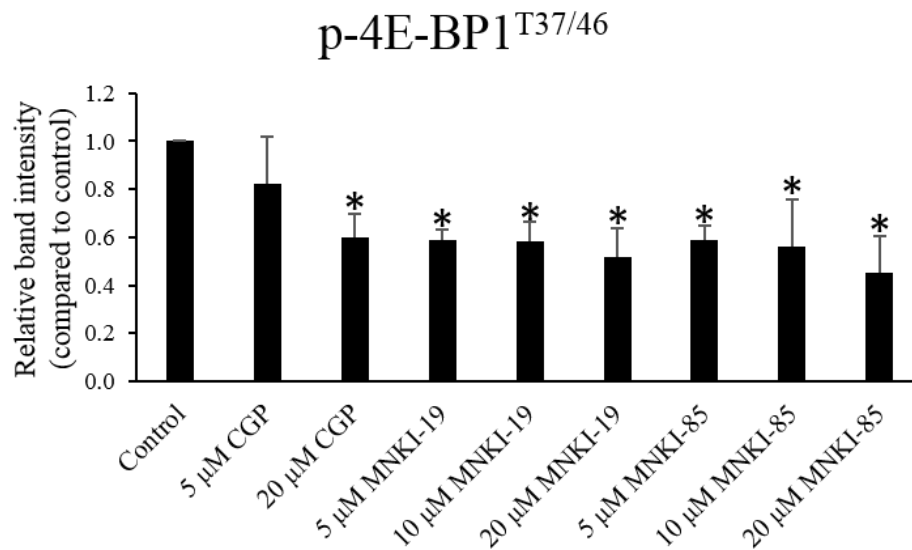

**Supplemental Figure 2.**

**Graphical representation of the relative band intensities of CDK4, CDK6 and p-Rb<sup>T826</sup> when compared to control in MOLM-13 cells upon treatment with the indicated concentrations of Mnk inhibitors for 1 h.** DMSO diluent is used as a control. Western blot results are quantified using the Image Lab software version 5.0 and statistical analysis is performed. Data represent the mean  $\pm$  SD of at least two independent repeats.

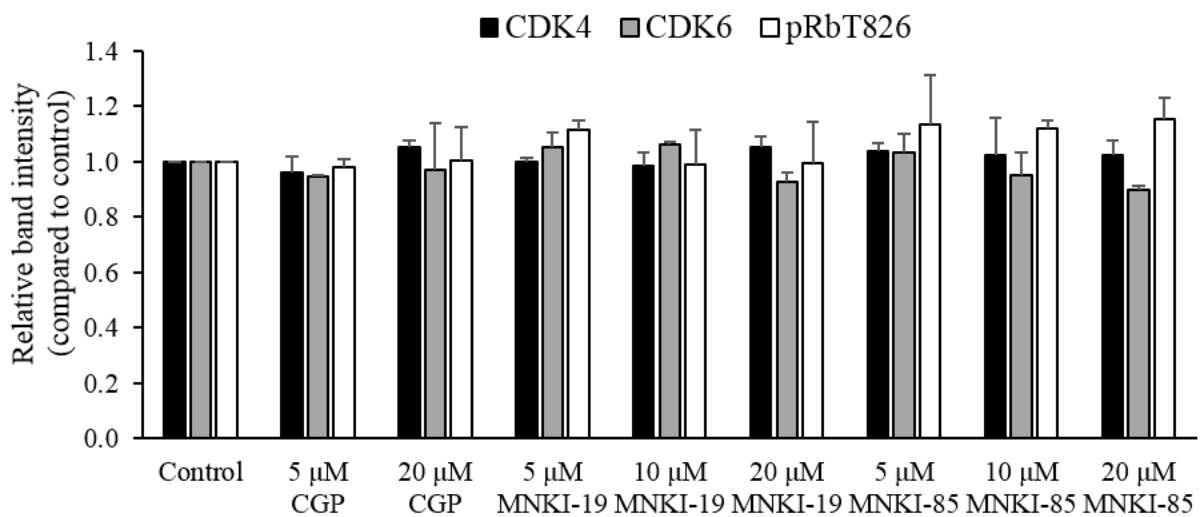

**Supplemental Figure 3.**

**Graphical representation of the relative band intensity of Rb phosphorylation at Thr826 when compared to control in MOLM-13 cells upon treatment with the indicated concentrations of Mnk inhibitors for 24 h.** DMSO diluent is used as a control. Western blot results are quantified using the Image Lab software version 5.0 and statistical analysis is performed. Data represent the mean  $\pm$  SD of at least two independent repeats. \* $p < 0.05$  when compared to control.

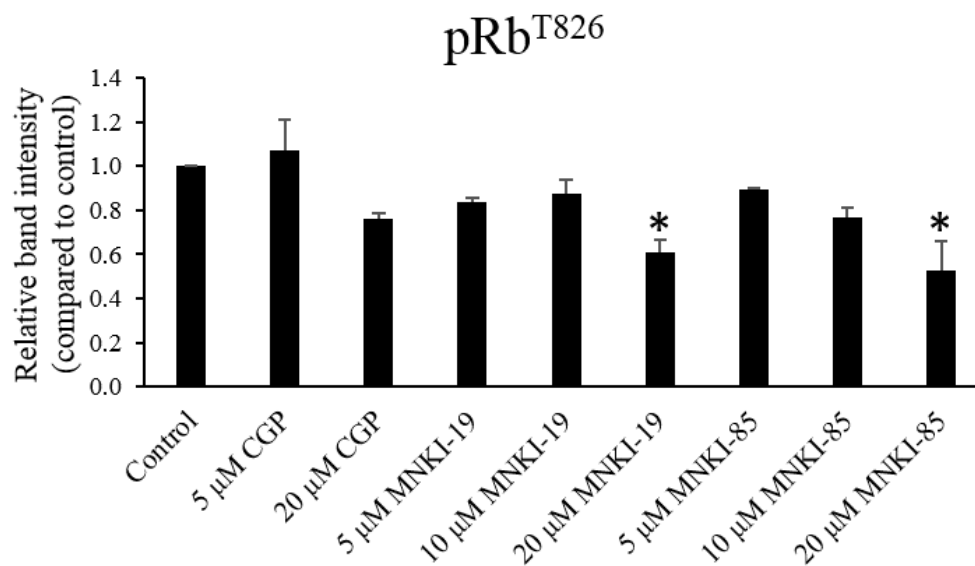

**Supplemental Figure 4.**

**Graphical representation of the relative band intensities of pRb<sup>T821</sup> and CDK6 when compared to control in MOLM-13 cells upon treatment with each Mnk inhibitor at 20  $\mu$ M for 24 h. DMSO diluent is used as a control. Western blot results are quantified using the Image Lab software version 5.0 and statistical analysis is performed. Data represent the mean  $\pm$  SD of at least two independent repeats.**

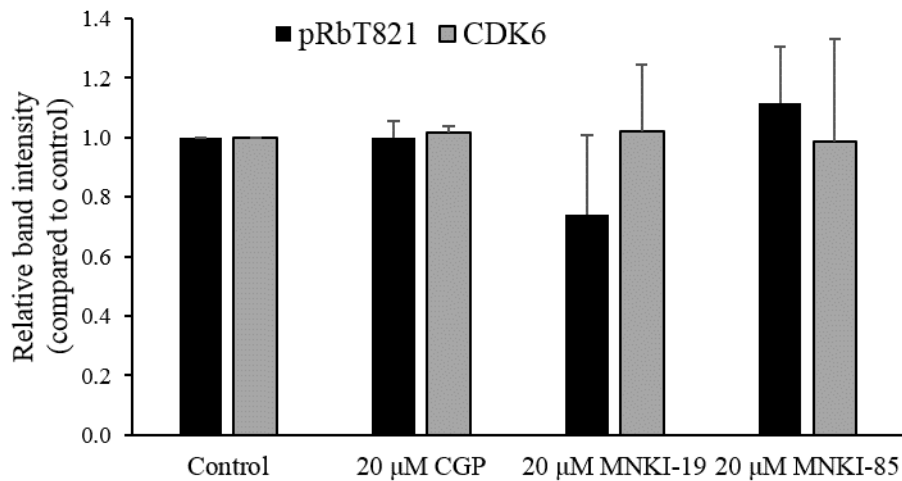

Supplement: Supplemental_98012.pdf [file Supplemental_98012.pdf]
